# Supplementary material for: Neddylation-dependent protein degradation is a nexus between synaptic insulin resistance, neuroinflammation and Alzheimer’s disease
Source: Springer Nature journal article supplement (doi:10.1186/s40035-021-00277-8), 2022-01-06
Supplement: MOESM1 [file 20008108]

## **Supplemental Figures and Table**

**Neddylation-dependent protein degradation is a nexus between synaptic insulin resistance, neuroinflammation and Alzheimer's disease**

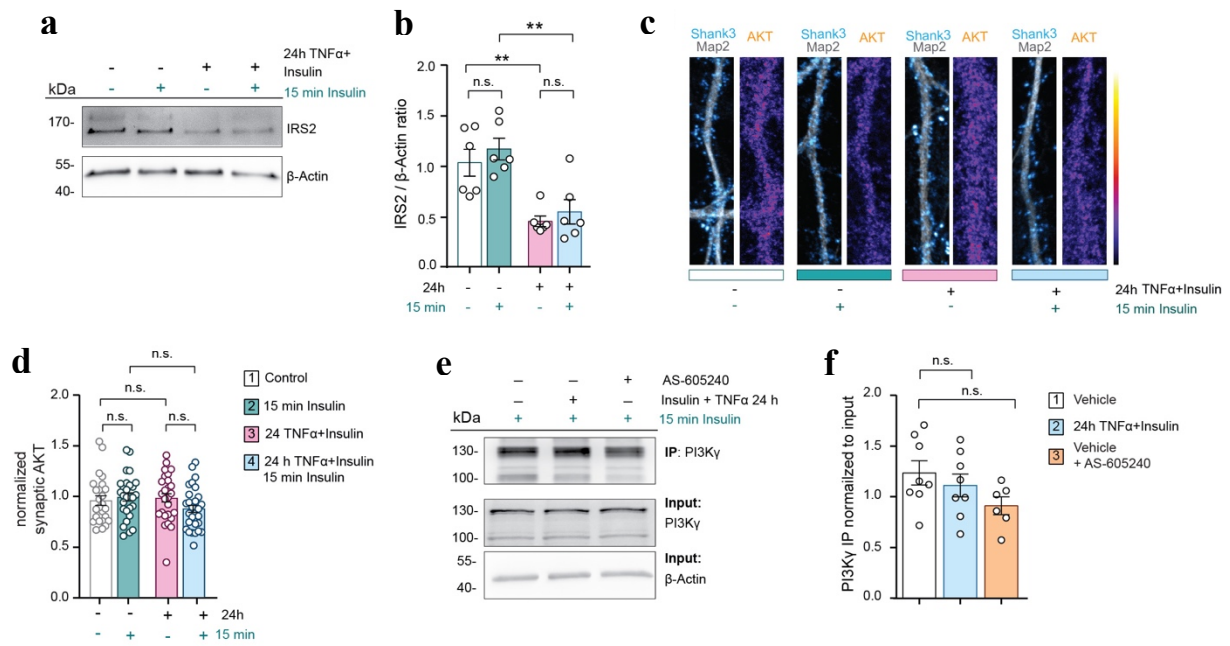

Figure S1

### Figure S1. Induction of synaptic IR in primary neurons

**a).** Immunoblots probed with IRS2 antibody. **b).** Quantitation of IRS2 levels normalized to  $\beta$ -Actin. **c).** Representative images of primary hippocampal neurons immunolabeled with pan-AKT antibodies. Excitatory synapses were identified by Shank3 staining. Original pixel intensities from 0 to 255 are represented as a gradient lookup table. Scale bar is 10  $\mu$ m. **d).** Scatter dot plot representing no differences in pan AKT immunofluorescence in the Shank3 mask. N-numbers (dendritic segments analyzed) from left to right.  $n=25$  for condition 1;  $n=28$  for conditions 2 & 4;  $n=26$  for condition 3. **e, f).** Representative immunoblots and analysis of immunoprecipitated PI3K $\gamma$  normalized to the respective PI3K $\gamma$  input.  $n=8$  for condition 1 & 2;  $n=6$  for condition 3.  $**P<0.01$ ,  $*P<0.05$  versus control, by two-way ANOVA followed by Bonferroni's post hoc test. Two-tailed Student's t-test was used in panel (F). n.s. = non-significant.

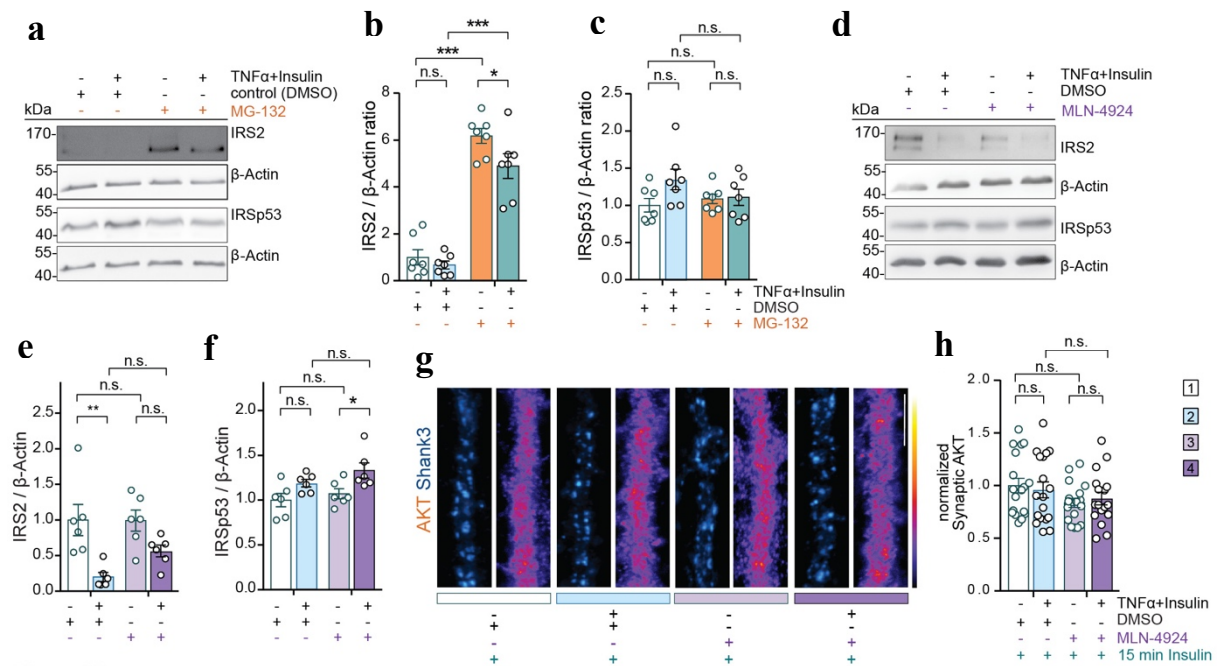

**Figure S2**

### Figure S2. Proteasomal degradation of IRS2 is not affected by neddylation

**a-f)** Representative immunoblots of total cell extracts from cortical neurons and the corresponding quantification. MG-132 (**a-c**) or MLN-4924 (**d-f**) were co-applied with insulin and TNF $\alpha$  for 24 h. Membranes were probed with antibodies directed against IRS2 or IRSp53. All blots were probed with  $\beta$ -Actin antibody for normalization. Quantification of the total IRS2 (**b**,  $n=7$ ) reveals a significant increase of the total protein level upon MG-132 treatment without alterations in IRSp53 (**c**,  $n=7$ ) protein levels normalized to  $\beta$ -Actin. **e)** MLN-4924 has no effect on the levels of IRS2 ( $n=6$ ) and **e)** elevated levels of IRSp53 ( $n=6$ ). **g-h)** MLN-4924 treatment had no effect on total AKT levels at synapses. Representative images of dendritic fragments of primary hippocampal neurons immunostained with a pan-AKT and Shank3 antibody (**g**). Original pixel intensities from 0 to 255 are represented as a gradient lookup table. **h)** Scatter dot plot representing no differences in pan AKT immunofluorescence in the Shank3 mask. Number of analyzed dendritic segments are depicted.  $n=18$  for conditions 1 & 3;  $n=16$  for condition 2;  $n=17$  for condition 4. Scale bar is 10  $\mu$ m. \*\*\* $P<0.001$ , \*\* $P<0.01$ , \* $P<0.05$  versus control, by two-way ANOVA followed by Bonferroni's post hoc test. n.s.= non-significant.

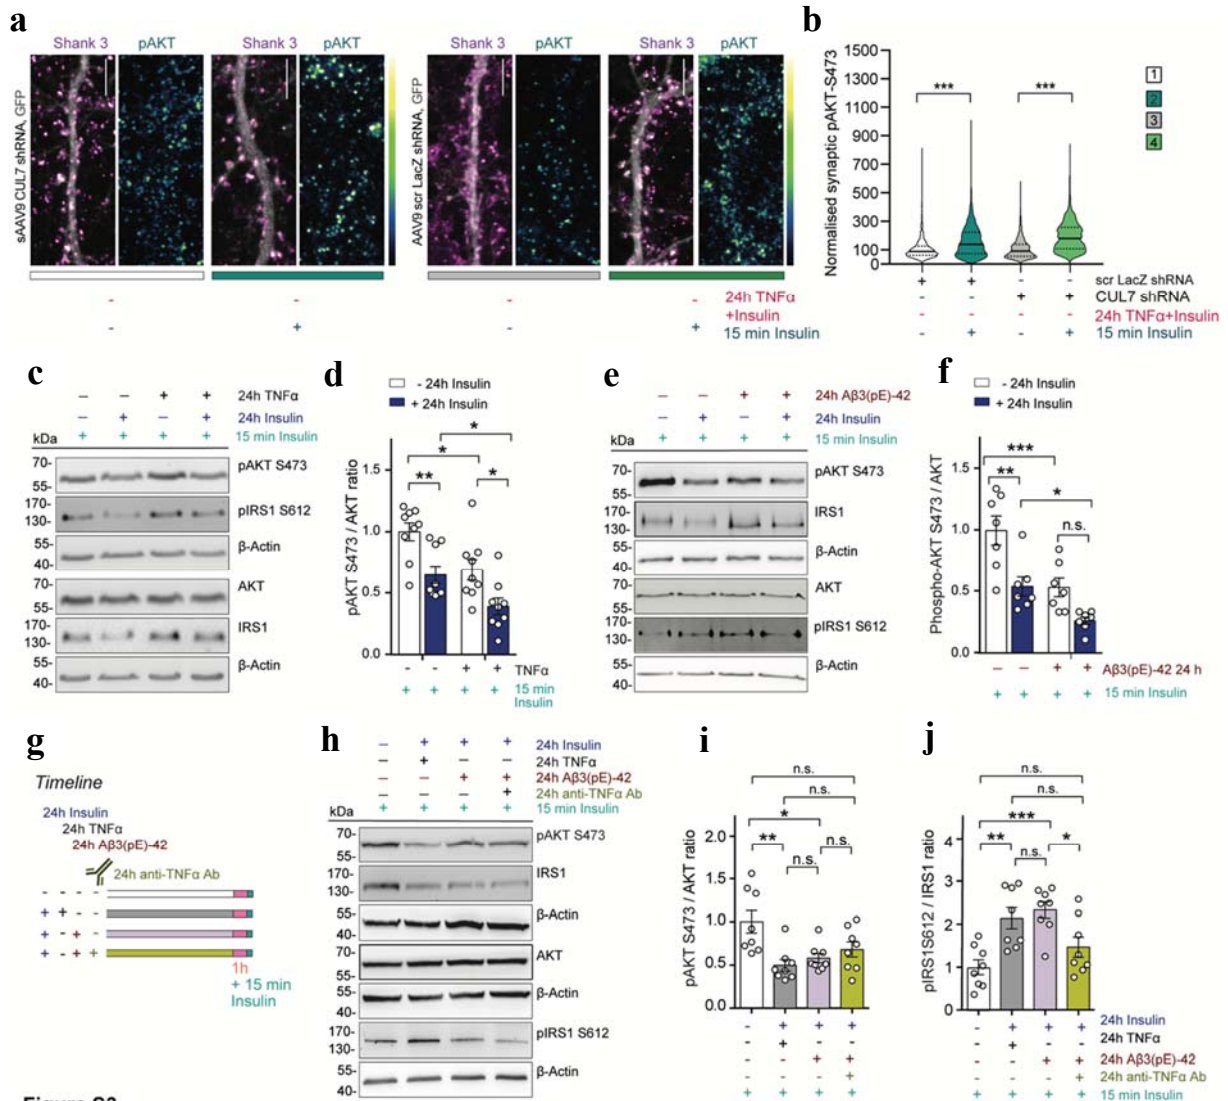

Figure S3

## Figure S3. CUL7 KD does not alter insulin signaling and A $\beta$ 3(pE) application exacerbates IR

**a-b).** Stimulation of primary hippocampal neurons infected with AAV9-shRNA CUL7 and AAV9-scr shRNA with insulin for 15 minutes results in activation of AKT under control conditions without application of TNF $\alpha$ /Insulin for 24h. Representative confocal images of dendrites immunolabeled with antibodies directed against pAKT and Shank3. Scale bar is 5  $\mu$ m. **b).** Violin plot representing means of pAKT immunofluorescence at synaptic sites. \*\*\* $P$ <0.001 versus control, by two-way ANOVA followed by Bonferroni's post hoc. Data are presented as the mean  $\pm$  S.E.M.  $N$  = number of spines detected by a Shank 3 mask.  $n$  = 1353 for condition 1;  $n$  = 1602 for condition 2;  $n$  = 994 for condition 3;  $n$  = 1445 for condition 4. **c).** Representative immunoblots of total cortical cell extracts were processed with antibodies against pAKT, AKT, pIRS1 and IRS1.  $\beta$ -Actin was used as a loading control. **d).**

Quantitation of pAKT normalized to AKT levels ( $n=9$ ). **e-f**). Mixed neuronal-glia cultures were treated for 24 h with insulin (100 nM) or A $\beta$ 3(pE)-42 (500 nM) or both. After washing for 1 h with medium, cells were stimulated with insulin for 15 min. Western blot analysis and quantitation of total cortical cell extracts probed with antibodies directed against AKT, pAKT, IRS1, and pIRS1.  $\beta$ -Actin was used as a loading control for normalization. **f**). Quantitation of pAKT normalized to AKT levels ( $n=7$ ), \*\*\* $P<0.001$ , \*\* $P<0.01$ , \* $P<0.05$  versus control, by two-way ANOVA followed by Bonferroni's post hoc test. **g**). Schematic of the experimental protocol where antibodies against TNF $\alpha$  were applied directly into the culture media for 24 hours. **h**). Representative immunoblots of total cortical cell extracts probed with antibodies against pAKT, AKT, pIRS1 and IRS1. Each blot was probed with a  $\beta$ -Actin antibody for normalization. **i-j**). Scatter dot plots show the quantitation of the pAKT/AKT ( $n=8$ ), and pIRS1/IRS1 ratios ( $n=8$ ). \*\*\* $P<0.001$ , \*\* $P<0.01$ , \* $P<0.05$  versus control, by two-way ANOVA followed by Tukey's multiple comparison test. n.s. = non-significant. Data are presented as the mean  $\pm$  S.E.M.

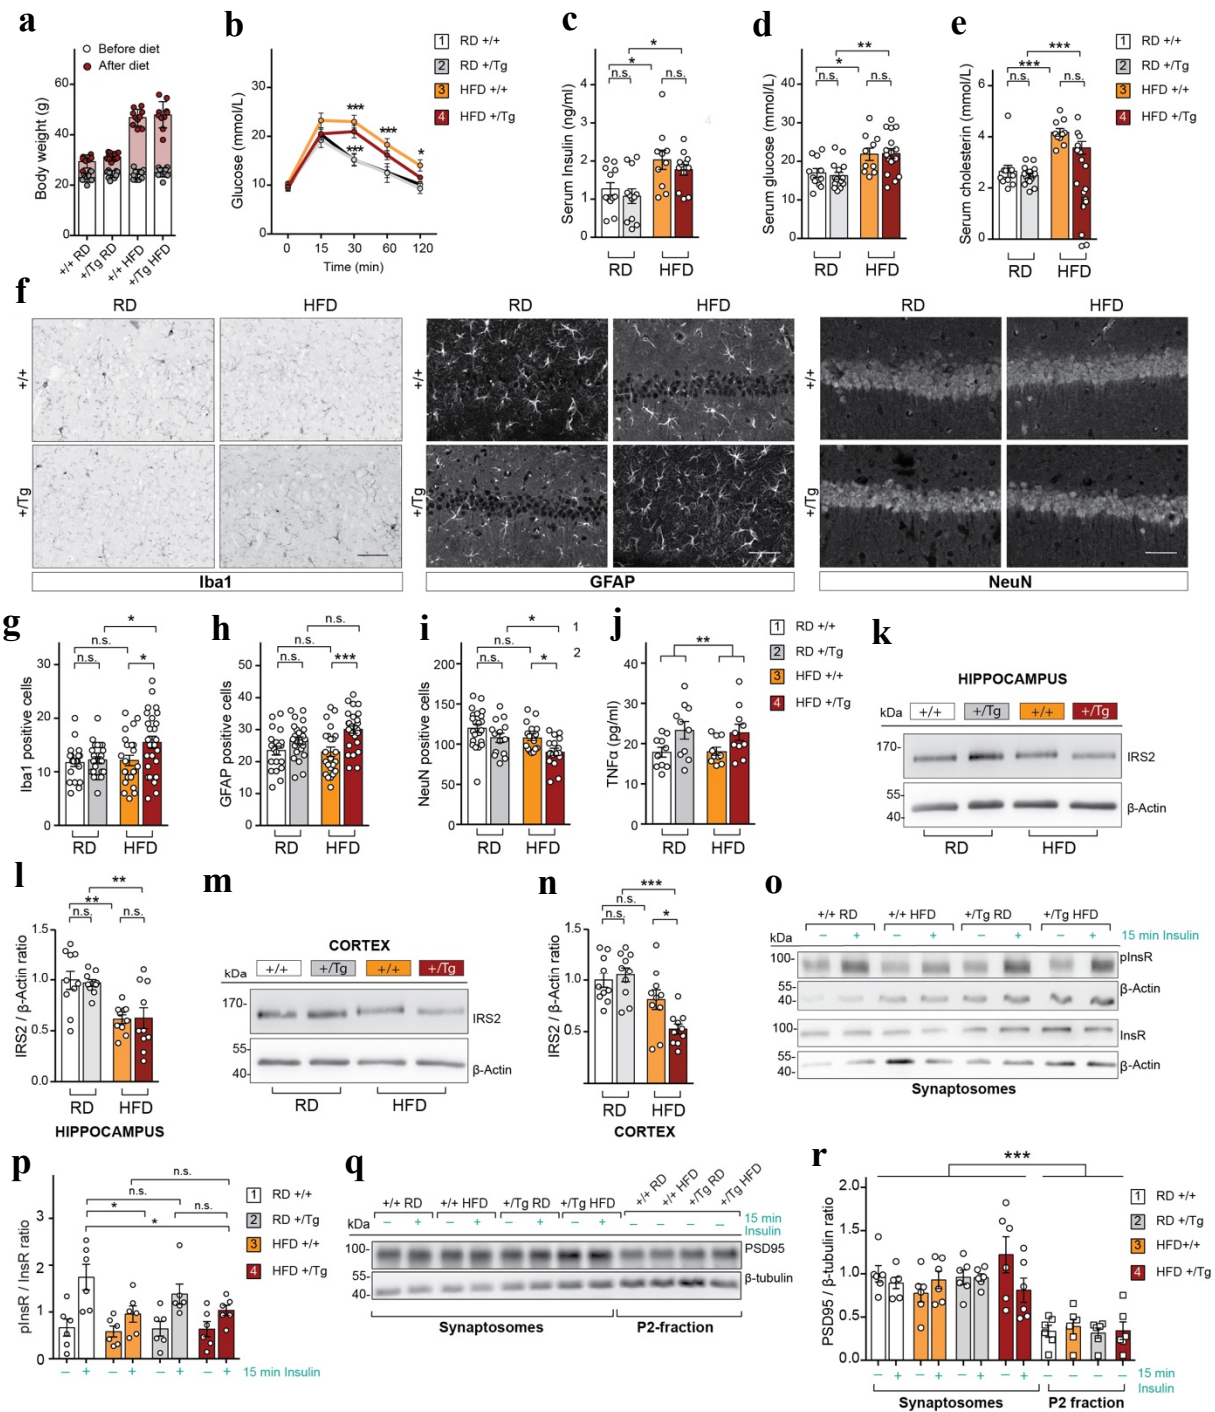

Figure S4

**Figure S4. MetS induces neuronal cell loss, astro- and microglia activation in the hippocampal CA1 region of heterozygous TBA2.1 mice**

**a).** Scatter dot plot of the body weight of mice fed with a RD or HFD determined at the beginning of the diet and before starting every experiment;  $n=8$  for condition 1;  $n=10$  for condition 2;  $n=12$  for condition 3;  $n=10$  for condition 4.  $+/+$ : wild-type; Tg: Transgene **b).** Time required for clearance of the blood sugar of mice fed with a RD or HFD. **c-e).** No differences were detected in serum insulin (**c**) for conditions 1,2 & 4  $n=12$ ;  $n=10$  for

condition 3, glucose (**d**) and cholesterol (**e**) levels between wt and heterozygous TBA2.1 mice fed with a HFD. In both **d** and **e**,  $n=11$  for condition 1;  $n=15$  for condition 2;  $n=10$  for condition 3;  $n=17$  for condition 4. **f-j**). Representative images of coronal sections stained for Iba1, GFAP and NeuN (**f**). Scale bar is 100  $\mu\text{m}$ . **g-i**). Quantitation of Iba1(**g**), GFAP(**h**) In both **g** and **h**.  $N = 20$  for condition 1;  $n=26$  for conditions 2 & 4;  $n=23$  for condition 3. Quantification of NeuN positive cells (**i**)  $n=22$  for condition 1;  $n=14$  for condition 2;  $n=16$  for condition 3;  $n=17$  for condition 4. **j**). Irrespective of the diet, TNF $\alpha$  levels in the cortex of heterozygous TBA2.1 mice is significantly higher compared to wt mice as determined from total lysates with ELISA ( $n=10$ ). **k-n**). HFD results in decreased levels of IRS2 in the hippocampus and cortex of heterozygous TBA2.1 mice. IRS2 protein levels were assessed by immunoblots from the total hippocampal or cortical homogenates.  $\beta$ -Actin was used as loading control. **l** ( $n=9$ ); **n** ( $n=10$ ). \*\*\* $P<0.001$ , \*\* $P<0.01$ , \* $P<0.05$  versus control, by two-way ANOVA followed by Bonferroni's post hoc test. **o, p**). Immunoblot analysis of stimulated with insulin synaptosomes isolated from cortices of wt and heterozygous TBA2.1 mice fed with HFD. Membranes were probed with antibodies detecting pInsR (Tyr1150), InsR, and PSD95. Scatter dot plot shows the quantitation of pInsR/InsR ratio ( $n=6$ ). \* $P<0.05$  versus control, by two-way ANOVA followed by Bonferroni's post hoc test. **q, r**). Representative immunoblots and quantitation of PSD95/ $\beta$ -tubulin ratios indicating similarities in synaptosome preparation between different genotypes fed with a RD and HFD. Synaptosomes isolated from cortices underwent *in vitro* insulin stimulation for 15 min. Stimulated and non-stimulated synaptosomes preparations were loaded onto SDS-PAGE as well as the crude membrane fraction (P2-fraction). ( $n=6$ ). \*\*\* $P<0.001$ , versus control, by unpaired t-Test. n.s. = non-significant. Data are presented as mean  $\pm$  S.E.M.

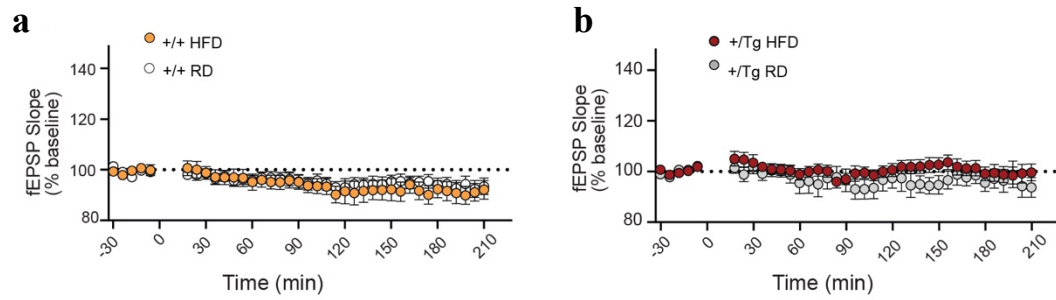

**Figure S5**

**Figure S5. Baseline recordings of fEPSP in hippocampal acute slices from wt and heterozygous TBA2.1 mice fed with a RD or HFD**

a, b) The diet and the genotype did not affect the baseline fEPSP slope recorded by the second input on the same slice in which LTD was induced by the first input (see Fig. 5).



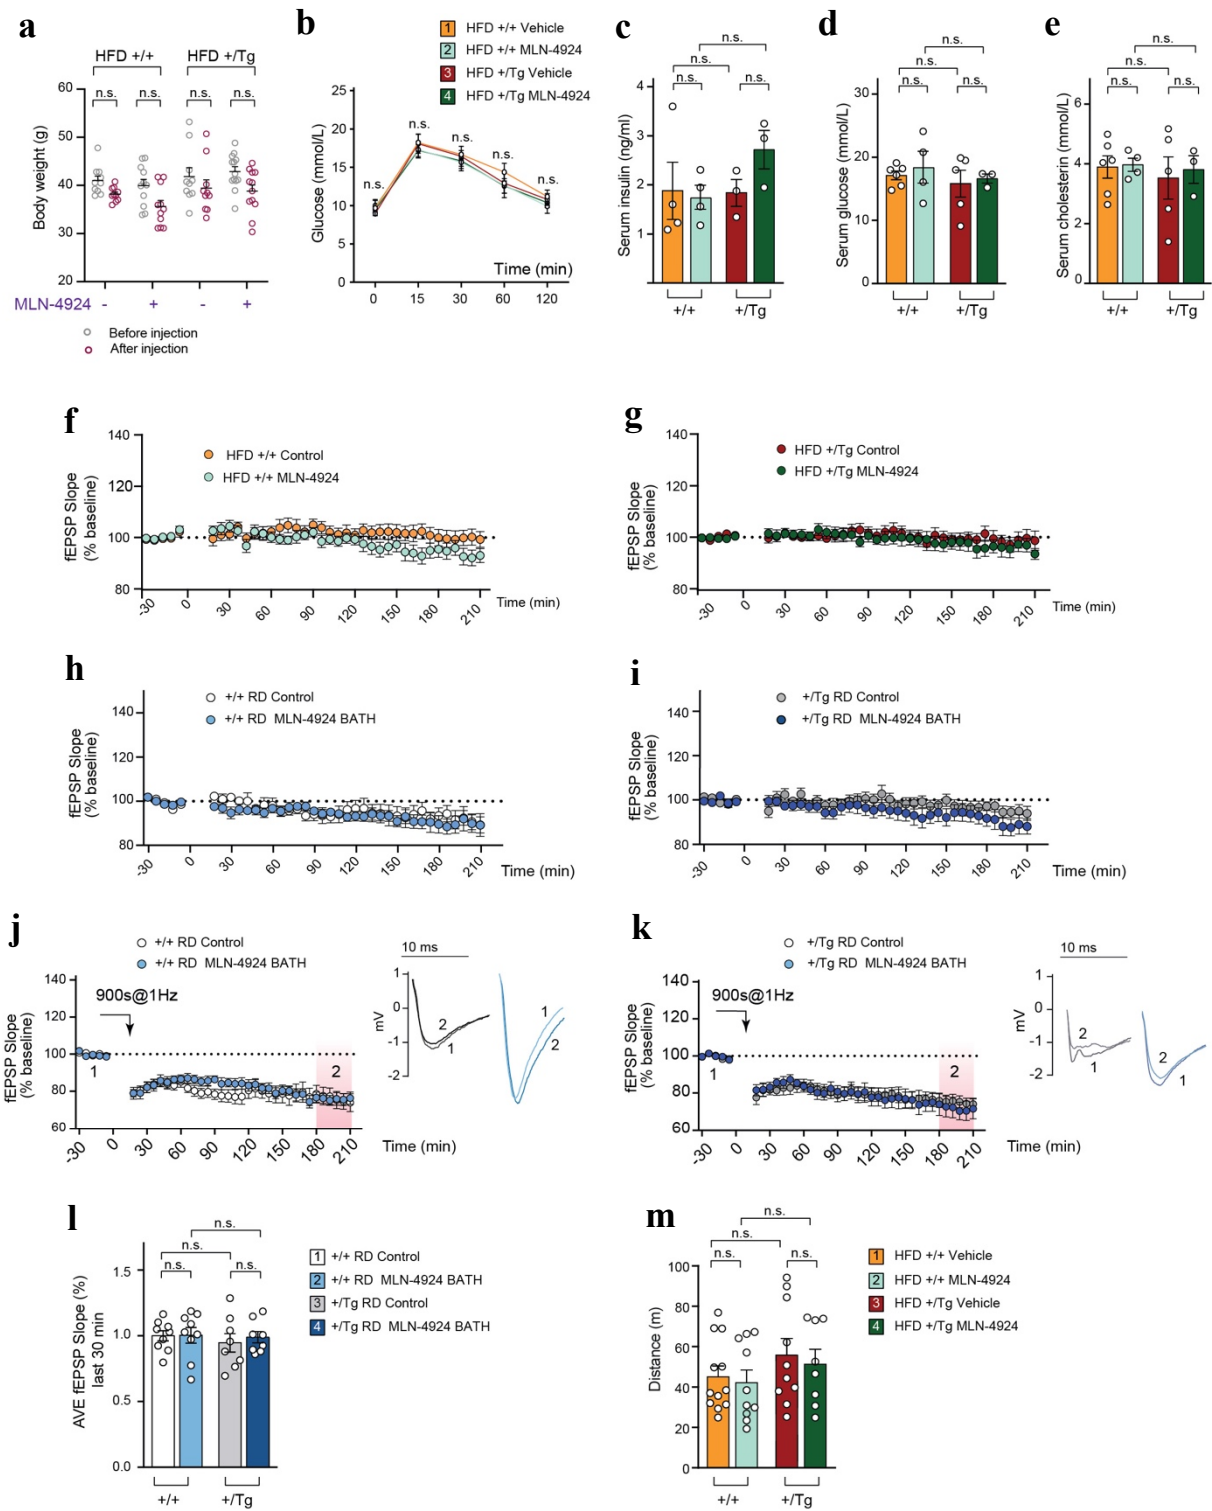

Figure S6

Figure S6. Characterization of the effects of MLN-4924 on basic metabolic parameters, basal fEPSP slope and LTD-dependent learning and memory in WT and heterozygous TBA2.1 mice fed with a RD or HFD

**a).** Body weight of heterozygous TBA2.1 fed with a HFD and treated either with vehicle or MLN-4924 was measured before and after the injection period of 14 days and the body weight mass is plotted in the scattered dot plot.  $n=10$  for groups 1 & 3;  $n=11$  for group 2;  $n=13$  for group 4. **b).** A glucose tolerance test was performed after 6 h of fasting one day after the last injection with vehicle/MLN-4924.  $n=8$  for group 1;  $n=9$  for groups 2, 3 & 4. Quantitation of insulin (**c**)  $n=4$  for groups 1 & 2;  $n=4$  for group 3 and  $n=4$  for group 4. Quantification of cholesterol (**d**), and glucose (**e**); in both **d** and **e**  $n=6$  for group 2;  $n=4$  for group 3;  $n=5$  for group 3; and  $n=3$  for group 4. Serum levels showed no significant differences between genotypes or drug treatment. n.s. = non-significant versus control, by two-way ANOVA of repeated measures followed by Bonferroni's post hoc test. **f, g).** MLN-4924 injection did not affect baseline fEPSP slope during LTD recording in wt and heterozygous TBA2.1 mice. **h).** Bath application of MLN-4924 did not affect baseline recordings of fEPSP slope during LTD recording in wt or heterozygous TBA2.1 animals fed with a RD. **j, k).** Bath application of MLN-4924 in hippocampal slices from wt or heterozygous TBA2.1 mice fed with a RD did not elicit alterations in plasticity. **l).** Averaged fEPSP slope values measured 180 -210 min after LTD induction showing no differences among the groups;  $n=8$  for groups 1 & 2;  $n=8$  for groups 3 & 4. **m).** Scatter dot plot shows no differences in the total distance walked during the habituation phase;  $n=12$  for group 1;  $n=10$  for group 2;  $n=10$  for group 3;  $n=8$  for group 4. n.s.=non-significant versus control, by two-way ANOVA followed by Bonferroni's post hoc test. Data are presented as the mean  $\pm$  S.E.M.

**Supplementary Table S1. Expression constructs and antibodies used in this study.**

| RESOURCE                                                       | SOURCE                                                                                            | IDENTIFIER                                         | Application |
|----------------------------------------------------------------|---------------------------------------------------------------------------------------------------|----------------------------------------------------|-------------|
| DNA plasmids / constructs                                      |                                                                                                   |                                                    |             |
| pCMV-IRS1-GFP                                                  | This paper, subcloned from pBlu2KSP-IRS1                                                          | RRID: Addgene_11027                                | Co-IP       |
| pCMV-IRS2-GFP                                                  | This paper, subcloned from pBABE-Puro-IRS2-Myc                                                    | RRID: Addgene_11373                                | Co-IP       |
| pAAV-CMV-GFP-P2A-CBD-6xHIS-IRS1                                | This paper                                                                                        | N/A                                                | PD          |
| pcDNA3-myc3-CUL1                                               | Ohta et. al., Mol Cell.1999, 3(4):535-41                                                          | RRID: Addgene_19896                                | Co-IP       |
| pcDNA3-myc3-CUL2                                               | Ohta et. al., Mol Cell.1999, 3(4):535-41                                                          | RRID: Addgene_19892                                | Co-IP       |
| pcDNA3-myc-CUL3                                                | Ohta et. al., Mol Cell.1999, 3(4):535-41                                                          | RRID: Addgene_19893                                | Co-IP       |
| pcDNA3-MYC3-CUL4A                                              | Ohta et. al., Mol Cell.1999, 3(4):535-41                                                          | RRID: Addgene_19951                                | Co-IP       |
| pcDNA3-MYC3-CUL4B                                              | Hu et. al., Genes Dev.2008, 22(7):886-871                                                         | RRID: Addgene_19922                                | Co-IP       |
| pcDNA3-myc-CUL 5                                               | Ohta et. al., Mol Cell.1999, 3(4):535-41                                                          | RRID: Addgene_19895                                | Co-IP       |
| pcDNA3-myc-CUL 7                                               | Andrews et al., Oncogene. 2006 25(33): 4534-4548                                                  | RRID: Addgene_20695                                | Co-IP       |
| pAAV-CMV-HA-NEDD8                                              | This paper, subcloned from HA-NEDD8 (Kamitani et. al., JBC, 1997. 272(45): 28557-6) into pAAV-CMV | RRID: Addgene_18711<br>Agilent #240071             | Co-IP       |
| pAAV-pCMV-HA                                                   | This paper                                                                                        | RRID: N/A                                          | Co-IP       |
| CUL7 shRNA targeting sequence: 5'GATGAGATCTATGCC AACTG 3'      | This paper                                                                                        | RRID: N/A<br>Subcloned into<br>RRID: Addgene_92155 | ICC         |
| scr LacZ shRNA targeting sequence: 5'AATTTAACCGCCAGT CAGGCT 3' | This paper                                                                                        | RRID: N/A<br>Subcloned into<br>RRID: Addgene_92155 | ICC         |

| Primary Antibodies                                      |                           |                                   |                        |
|---------------------------------------------------------|---------------------------|-----------------------------------|------------------------|
| anti-(pan) Akt (40D4) monoclonal mouse Ab               | Cell Signaling Technology | Cat.: #2920<br>RRID: AB_11476220  | ICC 1:500<br>WB 1:2000 |
| anti-phospho AKT/Ser473 polyclonal rabbit Ab            | Cell Signaling Technology | Cat.: #9271S<br>RRID: AB_329826   | ICC1:150<br>WB 1:2000  |
| anti- human Amyloid beta (N) (82E1) monoclonal mouse Ab | IBL International         | Cat.: #10323<br>RRID: AB_1630806  | IHC 1:200              |
| anti-A $\beta$ -pE3-218003 polyclonal rabbit Ab         | SySy                      | Cat.: #218003<br>RRID: AB_2056424 | IHC 1:200              |
| anti-CUL7 (Ab38)                                        | Sigma-Aldrich             | Cat.: #C1743                      | WB 1:1000              |

|                                                                                                                                       |                           |                                        |                                      |
|---------------------------------------------------------------------------------------------------------------------------------------|---------------------------|----------------------------------------|--------------------------------------|
| monoclonal mouse Ab                                                                                                                   |                           | RRID: AB_796201                        |                                      |
| anti-NEDD8<br>polyclonal rabbit Ab                                                                                                    | Proteintech               | Cat.: #16777-1-AP<br>RRID: AB_10598467 | WB 1:2000                            |
| anti-NeuN (A60)<br>monoclonal mouse Ab                                                                                                | Merk Millipore            | Cat.: #MAB377<br>RRID: AB_2298772      | ICC 1:500                            |
| anti-PI3 Kinase p110 $\gamma$<br>polyclonal rabbit Ab                                                                                 | Cell Signaling Technology | Cat.: #4252<br>RRID: AB_329871         | WB 1:1000                            |
| anti-PI3Kinase p110 $\gamma$<br>(D55D5)<br>monoclonal rabbit Ab                                                                       | Cell Signaling Technology | Cat.: #5405<br>RRID: AB_1904087        | endogenous IP<br>1:200               |
| anti-Iba1<br>polyclonal guinea pig Ab                                                                                                 | SySy                      | Cat.: #234004<br>RRID: AB_2493179      | ICC 1:300                            |
| anti-Homer1<br>monoclonal mouse Ab                                                                                                    | SySy                      | Cat.: #160011<br>RRID: N/A             | ICC 1:500                            |
| anti-phospho-IGF-1<br>Receptor $\beta$<br>(Tyr1135/1136)/Insulin<br>Receptor $\beta$ (Tyr1150-1151)<br>(19h7) monoclonal rabbit<br>Ab | Cell Signaling Technology | Cat.: #3024<br>RRID: AB_331253         | WB 1:1000                            |
| anti-Insulin Receptor $\beta$<br>(4B8) monoclonal rabbit<br>Ab                                                                        | Cell Signaling Technology | Cat.: #3025<br>RRID: AB_2280448        | WB 1:1000                            |
| anti-IRS1 Rb                                                                                                                          | Merk Millipore            | Cat.: #06-248<br>RRID: AB_2127890      | WB 1:500                             |
| anti-IRS2 (9.5.2)<br>monoclonal mouse Ab                                                                                              | Merk Millipore            | Cat.: #MABS15<br>RRID: AB_10615782     | WB 1:1000                            |
| anti-phospho-IRS1 /Ser<br>612 Rabbit monoclonal Ab                                                                                    | Cell Signaling Technology | Cat.: #3203<br>RRID: AB_1031167        | WB 1:1000                            |
| anti-IRSp53<br>polyclonal rabbit Ab                                                                                                   | Merk Millipore            | Cat.: #07-786<br>RRID: AB_612039       | WB 1:1000                            |
| anti-phospho-PKR /Thr451<br>polyclonal rabbit Ab                                                                                      | Merk Millipore            | Cat.: #07-886<br>RRID: AB_568879       | WB 1:1000                            |
| anti-TNF-alpha<br>polyclonal goat Ab                                                                                                  | R&D system                | Cat.: #AF-510-NA<br>RRID: AB_354511    | TNF-alpha<br>neutralization<br>1:500 |
| anti-mono- and<br>polyubiquitinated<br>conjugates (FK2)<br>monoclonal mouse Ab                                                        | Enzo Life Science         | Cat.: #BML-PW8810<br>RRID: AB_10541840 | WB 1:1000                            |
| anti-Shank3<br>polyclonal rabbit Ab                                                                                                   | SySy                      | Cat.: #162302<br>RRID: AB2619862       | WB 1:1000<br>ICC 1:500               |
| anti-Shank3<br>polyclonal guinea pig Ab                                                                                               | SySy                      | Cat.: #162304<br>RRID: AB2619863       | ICC 1:500                            |
| anti-PSD95(K28/43)<br>monoclonal mouse Ab                                                                                             | Neuromab                  | Cat.: #75-028<br>RRID: AB_2292909      | WB 1:1000 ICC<br>1:500               |
| anti-beta-actin (AC-15)<br>monoclonal mouse Ab                                                                                        | Sigma                     | Cat.: #A-5441<br>RRID: 476744          | WB 1:3000                            |
| anti-GFAP<br>polyclonal rabbit Ab                                                                                                     | Sigma-Aldrich             | Cat.: #G-9269<br>RRID: AB_477035       | IHC 1:400                            |
| anti-MAP2 (AP20)<br>monoclonal mouse Ab                                                                                               | Millipore                 | Cat.: #MAB3418<br>RRID: AB_94856       | ICC 1:500                            |
| anti-MAP2-AlexaFluor 488<br>conjugated monoclonal                                                                                     | Millipore                 | Cat.: #MAB3418x<br>RRID: AB11212966    | ICC 1:500                            |

| mouse Ab                                             |                                  |                                                           |                                     |
|------------------------------------------------------|----------------------------------|-----------------------------------------------------------|-------------------------------------|
| anti-Myc tag (9B11)<br>monoclonal mouse Ab           | NEB/Cell Signaling<br>Technology | Cat.: #2276 S<br>RRID: AB_94856                           | WB 1:1000                           |
| anti-HA<br>monoclonal rat Ab                         | Roche                            | Cat.: #11867423001<br>Cat#11867423001; RRID:<br>AB_390918 | WB 1:1000                           |
| anti-GFP Epitope Tag<br>(B34)<br>monoclonal mouse Ab | BioLegend                        | Cat.: #902601<br>RRID: AB_2565021                         | Heterologous<br>Co-IP, WB<br>1:1000 |
| Secondary Antibodies                                 |                                  |                                                           |                                     |
| Goat anti-rabbit-AlexaFluor<br>488                   | Thermo Fisher Scientific         | Cat.: #A-11034<br>RRID: AB_25766217                       | ICC/IHC<br>1:500                    |
| Donkey anti-rabbit-<br>AlexaFluor 488                | Molecular Probes                 | Cat.: #A-21206<br>RRID: AB_2535792                        | ICC/IHC<br>1:500                    |
| Goat anti-rabbit-AlexaFluor<br>568                   | Thermo Fisher Scientific         | Cat.: #A-11036<br>RRID: AB_10563566                       | ICC/IHC<br>1:500                    |
| Goat-anti-rabbit-Cy5                                 | Jackson Immuno Research          | Cat.: #111-175-144<br>RRID: AB_2338013                    | ICC/IHC<br>1:500                    |
| Goat-anti-rabbit-AlexaFluor<br>633                   | Molecular Probes                 | Cat.: #A-21070<br>RRID: AB_2535731                        | ICC/IHC<br>1:500                    |
| Goat anti-mouse-AlexaFluor<br>488                    | ThermoFisher Scientific          | Cat.: #A-11001<br>RRID: AB_2534069                        | ICC/IHC<br>1:500                    |
| Goat anti-mouse-AlexaFluor<br>568                    | ThermoFisher Scientific          | Cat.: #A-11031<br>RRID: AB_144696                         | ICC/IHC<br>1:500                    |
| Goat anti-mouse-AlexaFluor<br>647                    | Thermo Fisher Scientific         | Cat.: #A-21236<br>RRID: AB_2535805                        | ICC/IHC<br>1:500                    |
| Donkey anti-mouse-<br>AlexaFluor 647                 | Molecular probes                 | Cat.: #A-31571<br>RRID: AB_162542                         | ICC/IHC<br>1:500                    |
| Goat Anti-guinea pig-<br>AlexaFluor405               | Abcam                            | Cat.: #Ab175678<br>RRID: 282755                           | ICC/IHC<br>1:500                    |
| Goat anti-guinea pig-<br>AlexaFluor 488              | Molecular Probes                 | Cat.: #A-11073<br>RRID: AB_2534117                        | ICC 1:500                           |
| Goat anti-guinea pig-<br>AlexaFluor 568              | Invitrogen                       | Cat.: #A-11075<br>RRID: AB_141954                         | ICC<br>1:500                        |
| Goat Anti-guinea pig-<br>AlexaFluor 647              | Thermo Fisher Scientific         | Cat.: #A-21450<br>RRID: AB_141882                         | ICC/IHC<br>1:500                    |
| Goat Anti-Rat IgG Ab, HRP<br>conjugate               | Sigma Aldrich                    | Cat.: #AP136P<br>RRID: AB_11214444                        | WB 1:5000                           |
| Goat Anti Mouse IgG Ab                               | Jackson Immuno Research          | Cat.: #115-035-146<br>RRID: AB_2307392                    | WB 1:20000                          |
| Goat Anti rabbit igG Ab                              | Jackson Immuno Research          | Cat.: #115-035-144<br>RRID: AB_2307391                    | WB 1:20000                          |
